# Supplementary material for: A boron-nitride based dispersive composite coating on nickel-rich layered cathodes for enhanced cycle stability and safety
Source: Royal Society of Chemistry journal article supplement (doi:10.1039/d3ta01500a), 2023-01-01
Supplement: d3ta01500a1.pdf [file d3ta01500a1.pdf]

## Supplementary Information

# **Boron-Nitride Based Dispersive Composite Coating on Nickel-Rich Layered Cathode for Enhanced Cycle Stability and Safety**

Hsi Chen<sup>1,3</sup>, Yan-Cheng Chen<sup>1</sup>, Hao-Wen Liu<sup>1</sup>, Shu-Jui Chang<sup>1</sup>, Cheng-Hung Liao<sup>1</sup>,  
Senthil-Kumar Parthasarathi<sup>1</sup>, Satish Bolloju<sup>1</sup>, Yu-Ting Weng<sup>1</sup>, Jyh-Fu Lee<sup>2</sup>, Jin-Ming  
Chen<sup>2</sup>, Hwo-Shuenn Sheu<sup>2</sup>, Chih-Wen Pao<sup>2</sup>, and Nae-Lih Wu<sup>1,3,\*</sup>

<sup>1</sup>*Department of Chemical Engineering, National Taiwan University, Taipei 10617, Taiwan.*

<sup>2</sup>*National Synchrotron Radiation Research Center, Hsinchu 30076, Taiwan.*

<sup>3</sup>*Advanced Research Center for Green Materials Science and Technology, National Taiwan University, Taipei, 106, Taiwan.*

---

\*To whom correspondence should be addressed: [nlw001@ntu.edu.tw](mailto:nlw001@ntu.edu.tw)

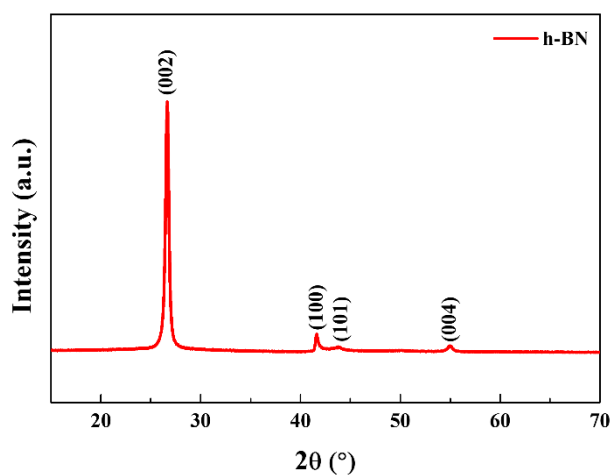

**Figure S1.** XRD pattern of h-BN.

**Table S1.** Rietveld refinement results of pristine NCM.

| Sample                   | NCM      |   |   |            |           |
|--------------------------|----------|---|---|------------|-----------|
| Rwp (%)                  | 1.39     |   |   |            |           |
| a (Å)                    | 2.87157  |   |   |            |           |
| c (Å)                    | 14.19595 |   |   |            |           |
| c/a                      | 4.94362  |   |   |            |           |
| Volume (Å <sup>3</sup> ) | 101.375  |   |   |            |           |
| Atom                     | Site     | x | y | z          | Occupancy |
| Mn                       | 3a       | 0 | 0 | 0          | 0.05      |
| Co                       |          |   |   |            | 0.12      |
| Ni                       |          |   |   |            | 0.819     |
| Li                       |          |   |   |            | 0.0111(4) |
| Li                       | 3b       | 0 | 0 | 1/2        | 0.989     |
| Ni                       |          |   |   |            | 0.0111(4) |
| O                        | 6c       | 0 | 0 | 0.25700(4) | 1         |

**Table S2.** Rietveld refinement results of NCM@PB.

| Sample                   | NCM@PB   |   |   |            |           |
|--------------------------|----------|---|---|------------|-----------|
| Rwp (%)                  | 1.49     |   |   |            |           |
| a (Å)                    | 2.87199  |   |   |            |           |
| c (Å)                    | 14.19788 |   |   |            |           |
| c/a                      | 4.94357  |   |   |            |           |
| Volume (Å <sup>3</sup> ) | 101.419  |   |   |            |           |
| Atom                     | Site     | x | y | z          | Occupancy |
| Mn                       | 3a       | 0 | 0 | 0          | 0.05      |
| Co                       |          |   |   |            | 0.12      |
| Ni                       |          |   |   |            | 0.819     |
| Li                       |          |   |   |            | 0.0105(5) |
| Li                       | 3b       | 0 | 0 | 1/2        | 0.989     |
| Ni                       |          |   |   |            | 0.0105(5) |
| O                        | 6c       | 0 | 0 | 0.25757(4) | 1         |

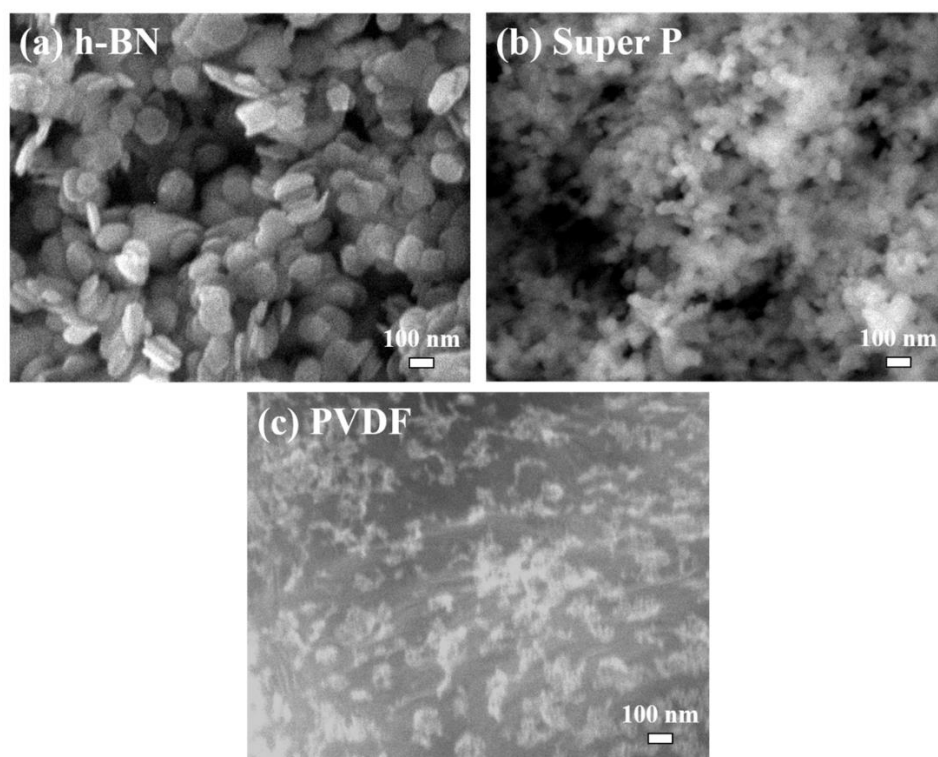

**Figure S2.** SEM images of (a) h-BN, (b) Super P and (c) calcined PVDF.

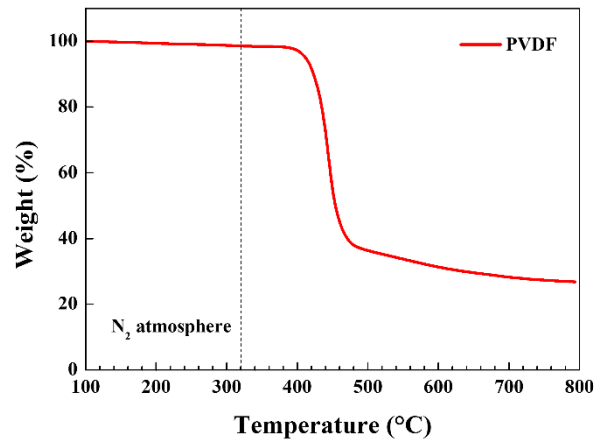

Figure S3. TGA curve of PVDF under N<sub>2</sub>-atmosphere.

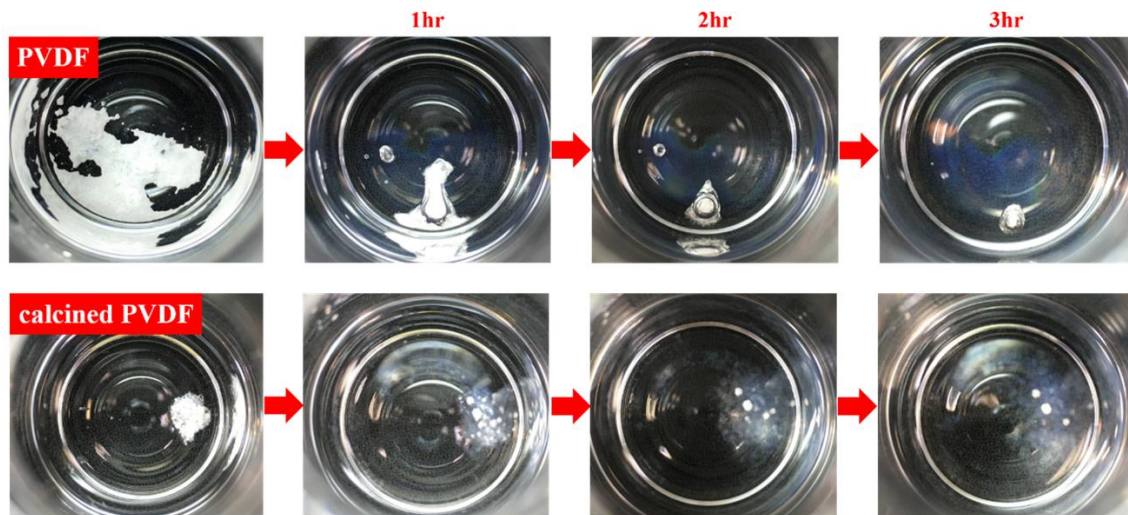

Figure S4. Solubility change of PVDF and 320°C calcined PVDF in NMP.

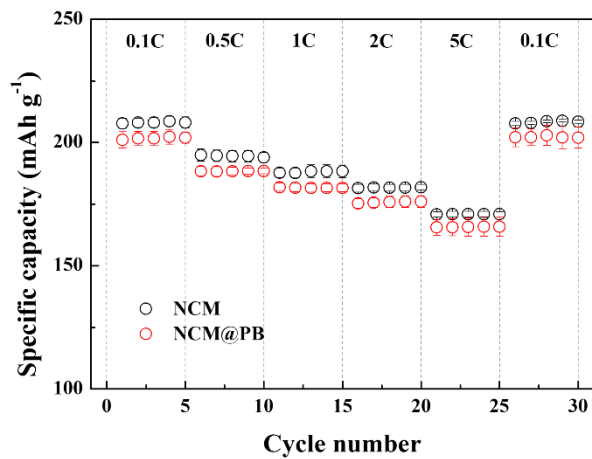

**Figure S5.** Rate capability of pristine NCM and NCM@PB (2.5-4.3V, error bars: standard deviation of three cells).

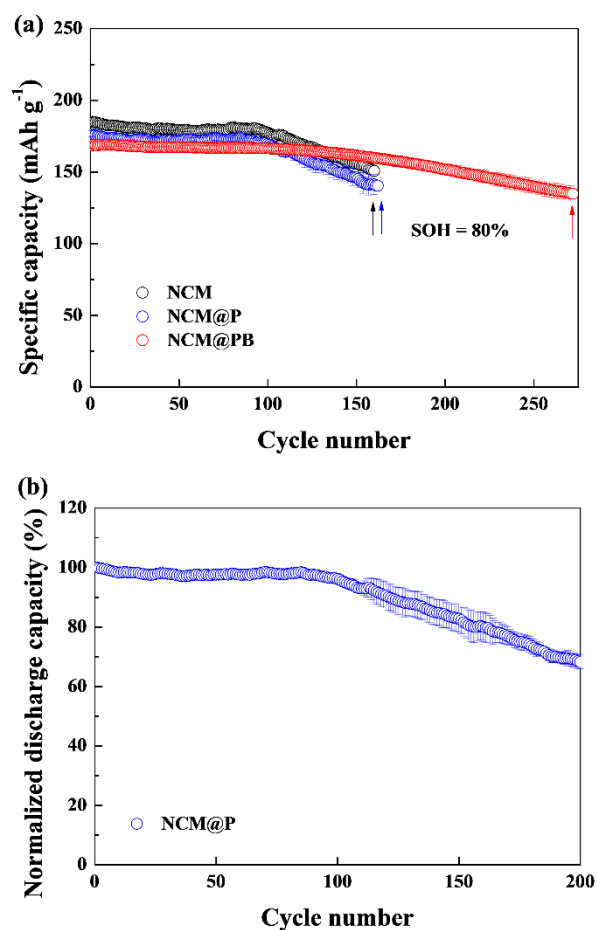

**Figure S6.** (a) Cycling performance of pristine NCM, NCM@P, NCM@PB at 1C-rate (2.5-4.3V; error bars: standard deviation of three cells) under room temperature; (b) Normalized cycling performance of NCM@P.

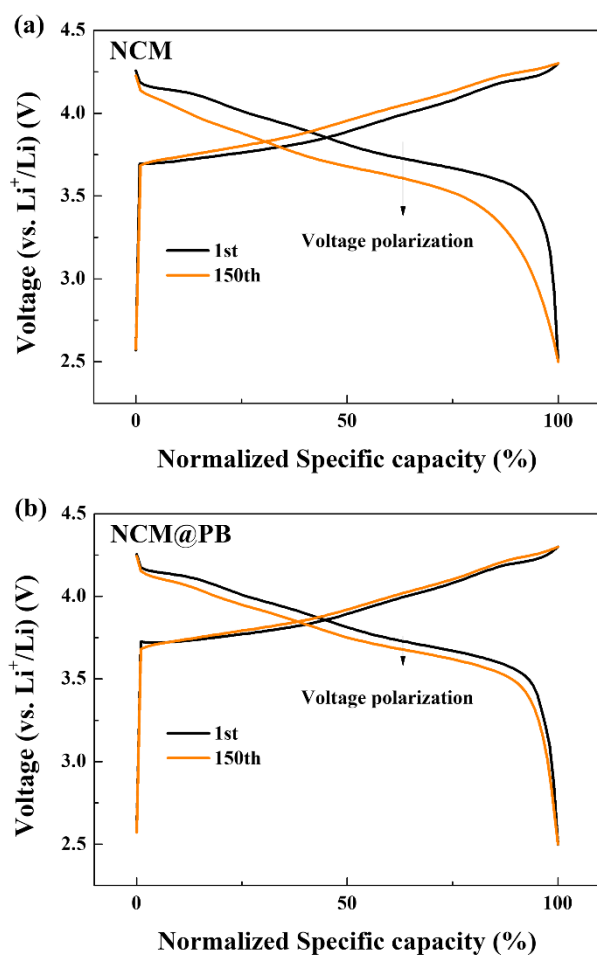

**Figure S7.** Normalized 1C-rate voltage profiles at different cycles of (a) pristine NCM and (b) NCM@PB.

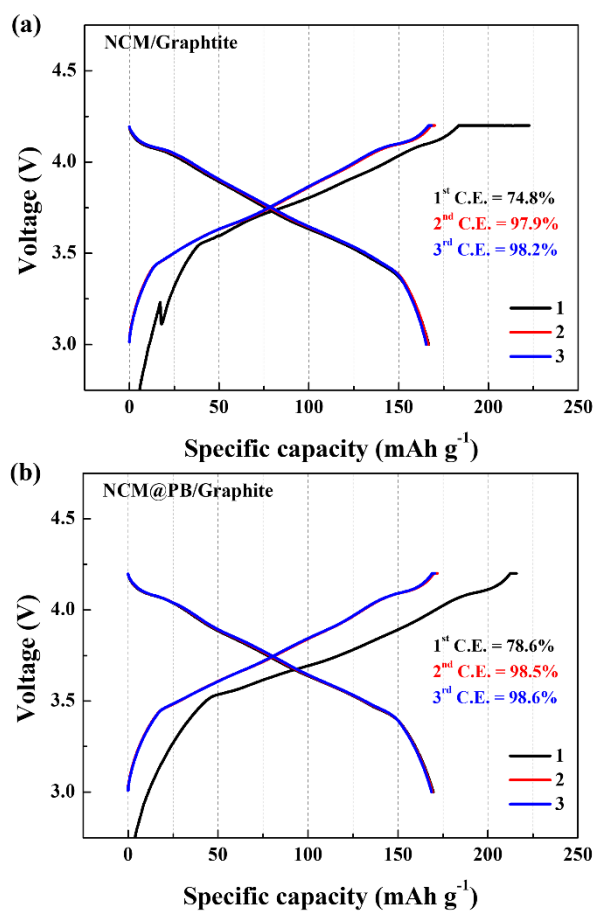

**Figure S8.** Formation cycles of (a) NCM/Graphite and (b) NCM@PB/Graphite full cells at 0.1C-rate.

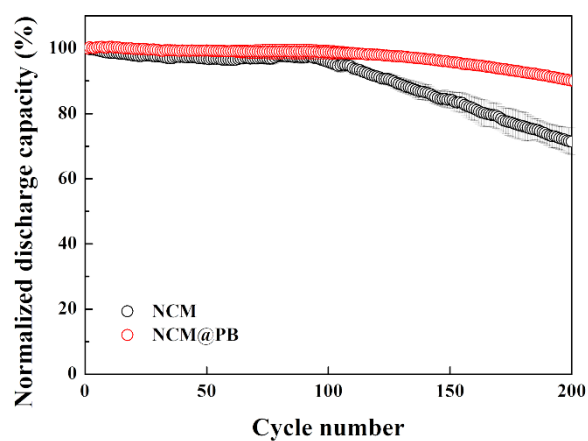

**Figure S9.** Normalized cycling performance of pristine NCM and NCM@PB at 1C-rate (2.5-4.3V; error bars: standard deviation of three cells).

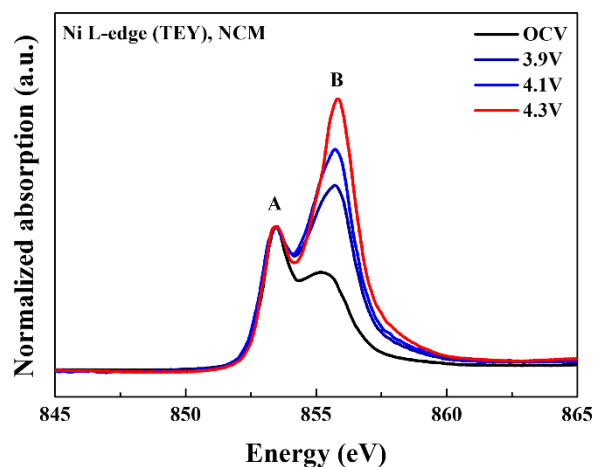

**Figure S10.** Ex situ Ni L<sub>3</sub>-edge spectra of pristine NCM during charging of the 1<sup>st</sup> cycle.

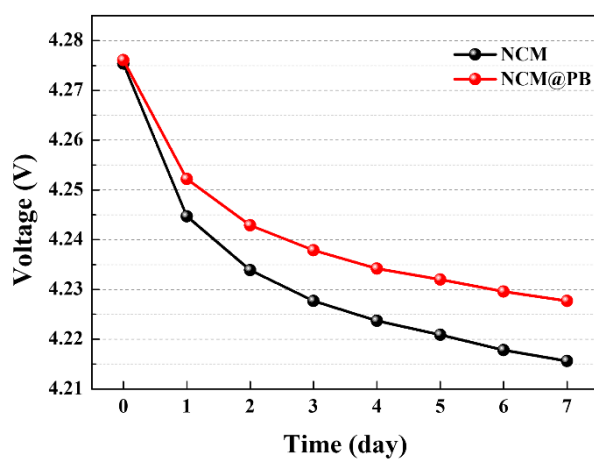

**Figure S11.** Self-discharge curves of pristine NCM and NCM@PB. Both cells were first charged to 4.3V and rest for 1 week. The voltage of both cells was recorded while resting. Note that the initial voltage is lower than 4.3V due to depolarization effect.



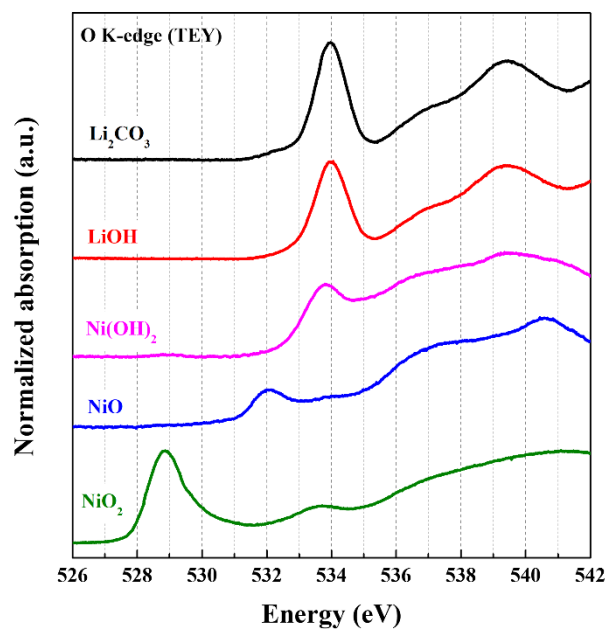

**Figure S12.** O K-edge spectra of  $\text{Li}_2\text{CO}_3$ ,  $\text{LiOH}$ ,  $\text{Ni}(\text{OH})_2$ ,  $\text{NiO}$  and  $\text{NiO}_2$ .

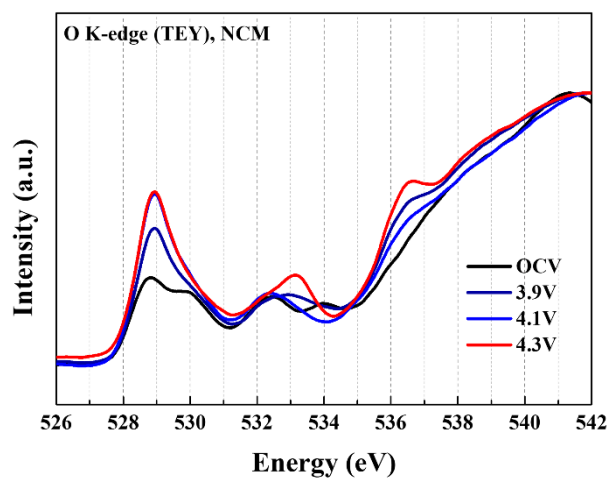

**Figure S13.** Ex situ O K-edge spectra of pristine NCM during charging of the 1<sup>st</sup> cycle.

**Table S3.** Summary of modification on Ni-rich cathodes

| Surface modification material                      | Method             | Cathode                                                                   | Process temperature (time)                         | Voltage range (V v.s. Li <sup>+</sup> /Li) | Cycle stability (25 °C)         | Thermal stability | Full cell performance | Ref. |
|----------------------------------------------------|--------------------|---------------------------------------------------------------------------|----------------------------------------------------|--------------------------------------------|---------------------------------|-------------------|-----------------------|------|
| Zr <sup>4+</sup>                                   | Doping             | LiNi <sub>0.83</sub> Co <sub>0.11</sub> Mn <sub>0.06</sub> O <sub>2</sub> | 500 °C (6hr) →<br>830 °C (12hr)                    | 3.0 – 4.3V                                 | 73.0%, 150 <sup>th</sup> at 1C  | N.A.              | N.A.                  | 1    |
| Al <sup>3+</sup>                                   | Doping             |                                                                           |                                                    |                                            | 74.7%, 150 <sup>th</sup> at 1C  |                   |                       |      |
| Zr <sup>4+</sup> /Al <sup>3+</sup>                 | Doping             |                                                                           |                                                    |                                            | 89.7%, 150 <sup>th</sup> at 1C  |                   |                       |      |
| Mg <sup>2+</sup>                                   | Doping             |                                                                           | 480 °C (5hr) →<br>750 °C (15hr)                    | 2.8 – 4.3V                                 | 84.5%, 200 <sup>th</sup> at 2C  | N.A.              | N.A.                  | 2    |
| Li <sub>3</sub> PO <sub>4</sub>                    | Coating            |                                                                           | 480 °C (N.A.)                                      |                                            | 80.5%, 200 <sup>th</sup> at 2C  |                   |                       |      |
| Mg <sup>2+</sup> /Li <sub>3</sub> PO <sub>4</sub>  | Doping<br>+Coating |                                                                           | 480 °C (5hr) →<br>750 °C (15hr) →<br>480 °C (N.A.) |                                            | 90.0%, 200 <sup>th</sup> at 2C  |                   |                       |      |
| Nb <sup>5+</sup>                                   | Doping             |                                                                           | 480 °C (5hr) →<br>750 °C (15hr)                    | 2.8 – 4.3V                                 | 86.6%, 200 <sup>th</sup> at 1C  | N.A.              | N.A.                  | 3    |
| Mo <sup>6+</sup> /Li <sub>2</sub> MoO <sub>4</sub> | Doping<br>+Coating |                                                                           | 500 °C (12hr)                                      | 2.7 – 4.3V                                 | 90.22%, 100 <sup>th</sup> at 1C | N.A.              | N.A.                  | 4    |
| W <sup>6+</sup>                                    | Doping             |                                                                           | 80 °C (5hr) → 750<br>°C (15hr)                     | 2.8 – 4.3V                                 | 69.9%, 500 <sup>th</sup> at 2C  | N.A.              | N.A.                  | 5    |

|                                                                                           |                    |                                                                           |                                 |                   |                                      |                                                                                                                               |                                                                              |                            |
|-------------------------------------------------------------------------------------------|--------------------|---------------------------------------------------------------------------|---------------------------------|-------------------|--------------------------------------|-------------------------------------------------------------------------------------------------------------------------------|------------------------------------------------------------------------------|----------------------------|
| Ti <sup>4+</sup> /LaNiLiO <sub>8</sub>                                                    | Doping<br>+Coating | LiNi <sub>0.8</sub> Co <sub>0.1</sub> Mn <sub>0.1</sub> O <sub>2</sub>    | 480 °C (5hr) →<br>830 °C (12hr) | 2.7 – 4.3V        | 90.55%, 200 <sup>th</sup> at 1C      | 15 °C-delayed decomp. temp.<br>43%-decreased heat release.<br>16%-decreased maximum heat flow.                                | N.A.                                                                         | 6                          |
| LiAlO <sub>2</sub>                                                                        | Coating            |                                                                           | 480 °C (5hr) →<br>750 °C (15hr) | 2.8 – 4.3V        | 85.8%, 200 <sup>th</sup> at 0.5C     | 11 °C-delayed decomp. temp.<br>47%-decreased heat release.<br>10%-decreased maximum heat flow.                                | N.A.                                                                         | 7                          |
| Li <sub>3</sub> PO <sub>4</sub> -AlPO <sub>4</sub> -<br>Al(PO <sub>3</sub> ) <sub>3</sub> | Coating            |                                                                           | 600 °C (6hr)                    | 3.0 – 4.3V        | 85.4%, 50 <sup>th</sup> at 0.5C      | 6 °C-delayed decomp. temp.<br>22%-decreased heat release.<br>24%-decreased maximum heat flow.                                 | 71.8%, 100 <sup>th</sup><br>at 0.5C                                          | 8                          |
| Li <sub>2</sub> MnO <sub>3</sub>                                                          | Coating            |                                                                           | 850 °C (5hr)                    | 2.7 – 4.3V        | 80.4%, 500 <sup>th</sup> at 1C       | 14 °C-delayed decomp. temp.<br>45%-decreased heat release.<br>27%-decreased maximum heat flow.                                | N.A.                                                                         | 9                          |
| MgHPO <sub>4</sub>                                                                        | Coating            |                                                                           | 500 °C (5hr) →<br>750 °C (15hr) | 3.0 – 4.3V        | 86.3%, 100 <sup>th</sup> at 0.5C     | N.A.                                                                                                                          | N.A.                                                                         | 10                         |
| <b>h-BN</b>                                                                               | <b>Coating</b>     | LiNi <sub>0.83</sub> Co <sub>0.12</sub> Mn <sub>0.05</sub> O <sub>2</sub> | <b>320 °C (0.5hr)</b>           | <b>2.5 – 4.3V</b> | <b>92.0%, 200<sup>th</sup> at 1C</b> | <b>40 °C-delayed decomp. temp.</b><br><b>44%-decreased heat release.</b><br><b>41%-decreased maximum heat</b><br><b>flow.</b> | <b>80%-capacity</b><br><b>mark: 360<sup>th</sup></b><br><b>cycle at 0.3C</b> | <b>This</b><br><b>work</b> |

## References

1. Z. Zhu, Y. Liang, H. Hu, A. Gao, T. Meng, D. Shu, F. Yi and J. Ling, *Journal of Power Sources*, 2021, **498**, 229857.
2. W. Xiao, Y. Nie, C. Miao, J. Wang, Y. Tan and M. Wen, *Journal of Colloid and Interface Science*, 2022, **607**, 1071-1082.
3. J. Wang, Z. Yi, C. Liu, M. He, C. Miao, J. Li, G. Xu and W. Xiao, *Journal of Colloid and Interface Science*, 2023, **635**, 295-304.
4. T. Teng, L. Xiao, L. Shen, J. Ran, G. Xiang, Y. Zhu and H. Chen, *Applied Surface Science*, 2022, **601**, 154101.
5. J. Wang, C. Liu, Q. Wang, G. Xu, C. Miao, M. Xu, C. Wang and W. Xiao, *Journal of Colloid and Interface Science*, 2022, **628**, 338-349.
6. H. P. Yang, H. H. Wu, M. Y. Ge, L. J. Li, Y. F. Yuan, Q. Yao, J. Chen, L. F. Xia, J. M. Zheng, Z. Y. Chen, J. Duan, K. Kisslinger, X. C. Zeng, W. K. Lee, Q. B. Zhang and J. Lu, *Advanced Functional Materials*, 2019, **29**.
7. W. Tang, Z. Chen, F. Xiong, F. Chen, C. Huang, Q. Gao, T. Wang, Z. Yang and W. Zhang, *Journal of Power Sources*, 2019, **412**, 246-254.
8. Z. Feng, R. Rajagopalan, D. Sun, Y. G. Tang and H. Y. Wang, *Chemical Engineering Journal*, 2020, **382**.
9. X. Huang, W. Zhu, J. Yao, L. Bu, X. Li, K. Tian, H. Lu, C. Quan, S. Xu, K. Xu, Z. Jiang, X. Zhang, L. Gao and J. Zhao, *Journal of Materials Chemistry A*, 2020, **8**, 17429-17441.
10. D.-Y. Hwang, H.-S. Kim and S.-H. Lee, *Journal of Materials Chemistry A*, 2022, **10**, 16555-16569.
